## N-glycosylated molecules act as a co-precipitant in RNA purification

Sungchul Kim<sup>1,§</sup>, Yong-geun Choi<sup>1</sup>, Kirsten Janssen<sup>2</sup>, Christian Büll<sup>3</sup>, Bhagyashree S. Joshi<sup>4</sup>, Adam Pomorski<sup>4,5</sup>  
Vered Raz<sup>6</sup>, Marvin E. Tanenbaum<sup>4,7</sup>, Pascal Miesen<sup>2,§</sup>, Zeshi Li<sup>8,§</sup>, and Chirlmin Joo<sup>4,9,§</sup>

<sup>1</sup> Center for RNA Research, Institute for Basic Science, Seoul 08826, Republic of Korea

<sup>2</sup> Department of Medical Microbiology, Radboud University Medical Center, 6525 GA Nijmegen, The Netherlands

<sup>3</sup> Department of Biomolecular Chemistry, Institute for Molecules and Materials, Radboud University, 6525 AJ, Nijmegen, The Netherlands

<sup>4</sup> Department of BioNanoScience, Kavli Institute of Nanoscience Delft, Delft University of Technology, 2629 HZ, Delft, The Netherlands

<sup>5</sup> Department of Chemical Biology, Faculty of Biotechnology, University of Wrocław, 50-383, Wrocław, Poland

<sup>6</sup> Human Genetics department, Leiden University Medical Centre, 2333ZC Leiden, The Netherlands

<sup>7</sup> Oncode Institute, Hubrecht Institute–KNAW and University Medical Center Utrecht, 3584 CT Utrecht, The Netherlands

<sup>8</sup> Department of Chemical Biology & Drug Discovery, Utrecht Institute for Pharmaceutical Sciences, Utrecht University, 3584 CG Utrecht, The Netherlands

<sup>9</sup> Department of Physics, Ewha Womans University, Seoul 03760, Republic of Korea

<sup>§</sup> Correspondence: [sungchulkim.kr@gmail.com](mailto:sungchulkim.kr@gmail.com), [Pascal.Miesen@radboudumc.nl](mailto:Pascal.Miesen@radboudumc.nl), [z.li@uu.nl](mailto:z.li@uu.nl), [c.joo@tudelft.nl](mailto:c.joo@tudelft.nl)

### Summary

A recent ground-breaking study suggested that small RNA from mammalian cells can undergo N-glycan modifications (termed glycoRNA)<sup>1</sup>. The discovery relied upon a metabolic glycan labeling strategy in combination with commonly used phase-separation-based RNA isolation. Following the reported procedure, we likewise identified an N-glycosylated species in the RNA fraction. However, our results suggest that the reported RNase sensitivity of the glycosylated species depends on the specific RNA purification method. This suggests the possibility of co-purifying unexpected RNase-insensitive N-glycoconjugates during glycoRNA isolation, hinting at the complex biochemical nature of glycoRNA. Our study underscores the need for further research to elucidate the structural and biochemical properties of glycoRNA.

### Introduction

N-linked glycosylation is a major post-translational modification that affects folding, stability, and other cellular functions of secretory and membrane-associated proteins<sup>2</sup>. N-glycosylation starts in endoplasmic reticulum by the assembly of high-mannose glycans and the transfer thereof to nascent peptides. The glycan is then trimmed by ER mannosidases and is further elaborated in the Golgi apparatus, where multi-antennary branching and extension, fucosylation, and sialylation<sup>3</sup> are introduced<sup>3</sup>. Expanding the world of N-glycosylation, a recent study reported that specific small non-coding RNA species in mammalian cells are modified with sialylated and

38 fucosylated N-glycans <sup>1</sup>. These molecules, referred to as glycoRNA, were reported to localize to the surface of  
39 mammalian cells and were shown to interact with either specific Siglec family receptors or P-selectin <sup>1,4,5</sup>.

40 Bioorthogonal labeling of glycans present in RNA isolates was a critical step in the discovery of  
41 glycoRNA <sup>1</sup>. Sugar analogs or their precursors modified with bioorthogonal chemistry tags, called metabolic  
42 chemical reporters (MCRs), play a crucial role in glycoscience, and enable the delineation of the biogenesis and  
43 function of glycosylation. MCR, combined with bioorthogonal labelling, is a popular method due to its simplicity of  
44 implementation, the rapidity of the chemical reactions, as well as the bio-compatibility and high specificity in  
45 biological environments <sup>6</sup>. MCRs exploit the tolerance of cellular glycan biosynthetic pathways towards unnatural  
46 modifications, which are eventually incorporated into glycans <sup>7</sup>. For example, peracetylated N-azidoacetyl-  
47 mannosamine (Ac<sub>4</sub>ManNAz) has been used as MCRs for sialic acid labeling. Ac<sub>4</sub>ManNAz is converted into azido-  
48 sialic acids (SiaNAz) and is normally incorporated at the terminus of glycans <sup>8</sup>. The azide tag in sialoglycans can  
49 be conjugated to alkyne-containing molecules, for instance fluorophores or biotin, via copper-catalyzed azide-  
50 alkyne cycloaddition (CuAAC) or copper-free strain-promoted alkyne-azide cycloaddition (SPAAC) <sup>9,10</sup>. The latter  
51 reaction was used to demonstrate the presence of glycoRNA <sup>1</sup>.

52 SiaNAz-containing glycans in RNA preparations were detected using acidic guanidinium-thiocyanate-  
53 phenol-chloroform (AGPC) phase partition <sup>1</sup>. This technique relies on chaotropic agents for cell lysis and protein  
54 denaturation, followed by phenol-chloroform-based phase separation for isolation of RNA from cellular  
55 components <sup>11,12</sup>. After alcohol precipitation and concentration, RNA is usually further cleaned up using proteases  
56 and DNases <sup>12</sup>. To purify glycoRNAs, silica-column-based solid-phase extraction for additional purification has  
57 employed <sup>1</sup>. This method becomes a common alternative or complementary method to AGPC-based RNA  
58 purification as it is believed to yield RNA with higher purity <sup>13</sup>. However, these procedures may introduce artifacts  
59 due to incomplete removal of contaminants, such as heparin, during RNA purification <sup>14,15</sup>.

60 Here, we present evidence that may have important implications for the glycoRNA detection.  
61 Recapitulating the findings of the previous reports <sup>1,4,5</sup>, N-glycosylated molecules were co-purified with RNA  
62 during both acidic phenol-chloroform and silica-based column extraction. However, loss of glycoRNA signal in  
63 RNA gel electrophoresis upon RNase treatment, which was previously interpreted as the degradation of  
64 glycoRNA <sup>1</sup>, was apparent only when RNA was isolated using silica columns. Our findings suggest that the RNase  
65 sensitivity of glycoRNA observed in the previous reports <sup>1,4,5</sup> is likely a peculiar property introduced during the  
66 post-RNase digestion purification steps, only in the use of silica columns. Further strengthening this conclusion,  
67 we demonstrate that N-glycosylated molecules may not be covalently linked to RNA but rather co-precipitated  
68 with RNA. When RNA molecules were depleted in solution by either RNase treatment or RNA fragmentation,  
69 glycoRNA molecules were hardly captured by silica-based columns. However, the addition of RNA or the increase  
70 of ethanol percentage in RNA binding buffer recovered the glycoRNA signal. Altogether, our data suggest that  
71 RNA isolation methods are susceptible to the presence of specific glycoconjugates. It indicates the potential co-  
72 existence of glycoRNAs and unknown N-glycosylated molecules in a complex form, raising intriguing questions  
73 about the chemical property of glycoRNA. Our conclusion is based on experiments performed in four laboratories  
74 using reagents that were independently purchased.

## 75 Results

### 76 N-glycosylated molecules co-purified with RNA are not RNase-sensitive

77 To detect glycoRNA, Ac<sub>4</sub>ManNAz was supplemented in mammalian cell cultures, purified cellular RNA, and  
78 conjugated the azide-labeled isolates with dibenzocyclooctyne-biotin (DBCO-biotin) using SPAAC. They  
79 visualized SiaNAz-labeled molecules in extracted RNA samples using an RNA (Northern) blotting-like method <sup>1</sup>.  
80 This approach can pose several potential complications, such as the use of nitrocellulose membranes for RNA  
81 transfer which overall perform less efficiently in RNA detection than positively charged nylon membranes <sup>16,17</sup>. To  
82 overcome the limitations of RNA blotting, we developed a simpler approach that eliminated the need for RNA  
83 membrane transfer (see methods) and instead relied on labelling SiaNAz-containing molecules with  
84 dibenzocyclooctyne-Cy5 (DBCO-Cy5) for direct fluorescent detection (Fig. 1a). TRIzol reagent was used to  
85 remove excess dyes and clean up the RNA sample (Fig. 1a and Extended Data Fig. 1a). This modified method  
86 enabled direct in-gel detection of RNA extracted from Ac<sub>4</sub>ManNAz-treated cells after separation by gel  
87 electrophoresis. As expected, no such signal was observed in RNA obtained from DMSO-treated control cells (Fig.  
88 1b). Importantly, the in-gel band pattern was similar to the one observed after transfer to nylon or nitrocellulose  
89 membranes, validating that the visualization of N-glycosylated molecules is not affected by the membrane blotting  
90 (Extended Data Fig. 1b). We only noted that detection of N-glycosylated molecules was more efficient after  
91 transferring to nylon membranes compared to nitrocellulose membranes. Nonetheless, due to its convenience, we  
92 used direct in-gel Cy5 detection in further experiments.

93 To confirm the previous reports of RNase sensitivity and enrichment in small RNA fractions for glycoRNA  
94 <sup>1</sup>, we included RNA size fractionation using silica columns and enzymatic treatment between dye removal and  
95 denaturing agarose gel electrophoresis. In line with the previous findings, the glycan signal was more intense in  
96 small RNA than in large RNA fractions, suggesting that the glycosylated moiety mainly co-eluted with small RNA  
97 (Fig. 1c). However, surprisingly, we observed that the glycan signal was not affected by either RNase or DNase  
98 treatments (Fig. 1c and Extended Data Fig. 1c), raising a question about the biochemical purity of glycoRNA in  
99 the conventional extraction methods.

100

### 101 RNase sensitivity of N-glycosylated molecules is determined by differential purification methods

102 We sought to find the cause for the observed difference in RNase sensitivity between our findings and those  
103 presented in the previous studies <sup>1,5</sup>. In our modified purification method, we minimized the use of silica columns  
104 and instead used TRIzol reagent for initial RNA purification, dye removal, and clean-up after enzymatic reactions.  
105 Furthermore, we modified the order of experimental steps, performing the click chemistry reaction before  
106 enzymatic treatments (“early-click” procedure; Fig. 2a). In comparison, in the procedure of Flynn et al. (2021), all  
107 RNA purification steps involved silica columns, and the click chemistry reaction was performed after enzymatic  
108 treatments. Finally, the RNA was again column-purified before gel electrophoresis and visualization (“late-click”  
109 procedure; Fig. 2a). We speculated that the choice of clean-up strategies could lead to the discrepancy in RNase  
110 sensitivity. Therefore, we compared the early-click and late-click procedures side by side. With the early-click  
111 approach, we observed strong fluorescent bands of high molecular weight in RNA gel electrophoresis. These  
112 bands were insensitive to RNase (Fig. 2b, top left) while the total RNA was efficiently digested by RNase (Fig. 2b,

113 bottom left). The late-click procedure yielded bands of the same apparent molecular weight but with a much  
114 weaker fluorescent signal. Importantly, RNase treatment led to the loss of bands, indicating that RNase sensitivity  
115 is affected by the choice of the RNA purification strategy (Fig. 2b, top and bottom right, respectively).

116 We speculated that the choice of the extraction method at the final purification step was most critical for  
117 recovery of glycosylated molecules and the cause for the difference in RNase sensitivity. To test this hypothesis,  
118 we kept all protocol steps identical except for the last RNA purification (Fig. 2c). Of note, using our early-click  
119 procedure, we found that the recovery of glycoRNA molecules was substantially poorer when silica columns were  
120 used to clean up RNA after the enzymatic reaction step. Nonetheless, we observed that RNase treatment led to  
121 the loss of glycoRNA signal when RNA was purified with silica columns, but not when TRIzol reagent was used  
122 (Fig. 2d and Extended Data Fig. 2a, 2b). Total RNA was efficiently degraded by RNase treatment irrespective of  
123 the purification method (Fig. 2d and Extended Data Fig. 2a,b). Taken together, these results indicate that the  
124 choice of purification method 'after' the enzymatic reactions results in different recovery of glycan associated  
125 molecules.

126 We note that, regardless of whether RNA was purified with silica columns or TRIzol extraction, the glycan  
127 signal was sensitive to the treatment with PNGase F and  $\alpha$ 2-3,6,8,9 neuraminidase A (Fig. 2d, and Extended Data  
128 Fig. 2a,b). PNGase F, is an amidase that cleaves oligomannose-, hybrid-, and complex-type N-glycans from  
129 glycoproteins/-peptides<sup>18</sup>, and  $\alpha$ 2-3,6,8,9 Neuraminidase A, which is a sialidase that removes terminal sialic acid  
130 residues linked to a penultimate sugar<sup>19</sup>. The glycan signal was also insensitive to proteinase K treatment.  
131 Instead, adding proteinase K resulted in the loss of additional bands appearing below the apparant glycoRNA  
132 bands (presumably peptide contaminants) in the gel image (Fig. 2e). This suggests that the detected glycosylated  
133 molecules in our experiments contain hybrid or complex N-glycans and exhibit the same reactivities towards  
134 glycosidases and proteases as reported for glycoRNA<sup>1</sup>.

135 To further scrutinize our interpretation, we applied our approach to various RNases with distinct substrate  
136 specificities. While RNase A catalyzes the cleavage of single-stranded RNA (ssRNA) after pyrimidine nucleotides  
137<sup>20</sup>, RNase T1 specifically degrades ssRNA at G residues<sup>21</sup>; benzonase can degrade various forms of DNA and  
138 RNA<sup>22</sup>; RNase H cleaves RNA in RNA:DNA hybrids<sup>23</sup>; and nuclease P1 hydrolyzes phosphodiester bonds in  
139 RNA and ssDNA without base specificity<sup>24</sup>. Our results demonstrated that RNase cocktail, comprising RNase A  
140 and T1, and benzonase degraded RNA completely, and RNase T1 and nuclease P1 digested almost all RNA into  
141 small pieces, whereas RNase H did not result in RNA degradation (Fig. 2f and Extended Data Fig. 2c). Under all  
142 these conditions, labeled molecules remained intact after TRIzol clean-up. However, complete RNA degradation  
143 by RNase A, RNase T1, benzonase and nuclease P1 led to the loss of the glycan signal after clean-up using silica  
144 columns (Extended Data Fig. 2c). This shows that the presence of RNA is needed for the glycan recovery during  
145 late click procedures, irrespective of the choice of nucleases. At this point, to further rule out any potential artifacts  
146 arising from the use of the Cy5 dye, we performed the click reaction experiment with DBCO-PEG4-biotin to label  
147 metabolically azide-conjugated molecules. Yet, despite following a method similar to the previous studies<sup>1,5</sup>, we  
148 observed that the enzyme reactivities were fully dependent on RNA isolation strategy<sup>1</sup> (Fig. 2f Extended Data Fig.  
149 2d).

150

### 151 **The efficiency of alcohol precipitation correlates with the recovery of glycoRNA using silica columns**

152 We set out to understand why glycosylated molecules were poorly recovered when using silica column purification.  
153 Our previous observation suggested that linear acrylamide was essential as a co-precipitant in the alcohol  
154 precipitation for glycoRNA recovery in the presence of RNase treatment using the early-click protocol (Fig. 2b).  
155 This made us speculate that the ethanol percentage and the presence of co-migrating molecules in the binding  
156 buffer might be a determinant factor for the efficiency of the glycoRNA capture. Commercially available solid-  
157 phase (silica-based) RNA extraction kits use low dielectric constant solvent, like ethanol or isopropanol, for  
158 dehydration before silica column binding. This is to reduce the polarity of the aqueous solution<sup>25</sup>. Manufacturers'  
159 instructions typically recommend the use of ethanol percentage at around 50% for silica column binding. To  
160 investigate if the binding efficiency of glycosylated molecules, including glycoRNAs, to silica columns is enhanced  
161 when the ethanol percentage in solutions increases above 50%, we varied the level of ethanol or isopropanol  
162 from 20% to 80% and tested the effect of RNase treatment (Fig. 3a). We found that glycosylated molecules were  
163 not captured at ethanol concentrations below 40%, regardless of RNase treatment. In line with our previous  
164 observations, at 50% ethanol concentration, glycosylated molecules were recovered in untreated conditions but  
165 not in the RNase-treated condition (Fig. 3b,c and Extended Data Fig. 3). When the percentage of ethanol and  
166 isopropanol increased, glycosylated molecules were recovered more efficiently (Fig. 3b,c and Extended Data Fig.  
167 3). At around 60% ethanol concentrations, the glycosylated signal became visible even in the RNase-treated  
168 condition (Fig. 3b, c and Extended Data Fig. 2b and 3). Similar results were obtained when ethanol was replaced  
169 with isopropanol (Fig. 3b). The dependency of glycoRNA capture on ethanol or isopropanol percentage has been  
170 reported in a recent work<sup>26</sup>. Thus, we concluded that glycoRNA molecules together with unknown glycosylated  
171 molecules could be adsorbed into the silica matrix in a dehydration power-dependent manner and speculated that  
172 RNA molecules might work as a co-binder to improve the recovery efficiency of glycosylated molecules.

173

### 174 **RNA facilitates the precipitation and adsorption of glycosylated molecules on silica columns**

175 Our observation indicates that glycosylated molecules in RNA preparations are not digested by RNase but only  
176 become less non-specifically adsorbed on silica columns at around 50% ethanol concentration when RNA had  
177 been degraded. This led us to the hypothesis that, acting as a co-binder, glycoRNA exists as a complex form with  
178 other glycosylated molecules in the purified RNA samples and that the presence of RNA facilitates the adsorption  
179 of glycosylated molecules on the silica columns, thereby reducing the contribution from ethanol. In this regard, the  
180 recovery of glycosylated molecules, possibly complexed with glycoRNAs, should be restored if exogenous RNA is  
181 added to prior RNA-depleted samples. We thus performed a rescue experiment by adding total RNA extracted  
182 from unlabeled HeLa cells (i.e., not exposed to Ac<sub>4</sub>ManNAz) to the RNase treated sample (Fig. 4a). To ensure  
183 newly added RNA was not degraded by residual RNase activity, we removed RNase thoroughly by treating  
184 samples with proteinase K followed by TRIzol extraction. Strikingly, exogenously added, unlabeled total RNA  
185 effectively reduced the required minimum ethanol percentage for binding of glycosylated molecules to silica  
186 columns (Fig. 4b). Adding only one-tenth of the amount of RNA typically present in our RNA preparation was

187 sufficient to fully restore recovery (Fig. 4b). Similarly, unlabeled RNA from a different cell line (K562) enhanced  
188 binding efficiency of glycosylated molecules (Extended Data Fig. 4a,b). Moreover, partially fragmented RNA was  
189 sufficient to co-precipitate glycosylated molecules (Extended Data Fig. 4c,d). Only intense RNA fragmentation,  
190 which resulted in almost complete RNA degradation, impaired recovery akin to RNase treatment. Notably, adding  
191 exogenous total RNA to these fragmented samples rescued the efficient binding of glycosylated molecules to  
192 silica matrix (Extended Data Fig. 4e). Interestingly, the addition of plasmid DNA had little effect on the minimum  
193 ethanol percentage required for binding of glycosylated molecules to silica (Fig. 4c). These results suggest RNA,  
194 but not double-stranded DNA, may specifically interact with glycosylated molecules, leading to their co-isolation in  
195 silica-column based extraction methods.

196

## 197 **Discussion**

198 The recent description of N-glycosylated small RNA molecules has shaken our view on the principles of  
199 glycosylation and expanded the repertoire of post-transcriptional RNA modifications <sup>1</sup>. Our findings indicate that  
200 N-glycosylated molecules are indeed present in RNA preparations from mammalian cells. However, we  
201 demonstrated that these N-glycosylated molecules become depleted only in RNase-treated total RNA eluted from  
202 silica columns, making it seem like glycoRNA is digested by RNase. This elusive RNase sensitivity does not  
203 appear when phenol-chloroform based extraction methods are used. In addition, these molecules are resistant to  
204 DNase and proteinases.

205 This prompted us to investigate the mechanism of non-specific co-purification of glycosylated molecules  
206 during silica-column purification. Such molecules bind to the silica matrix even in the absence of RNA when the  
207 binding buffer contains ethanol concentrations of 60% or higher or isopropanol. The addition of exogenous RNA  
208 enhanced the binding capability of glycosylated molecules to silica columns, indicating that RNA acts as a co-  
209 precipitant. Our data demonstrate the co-isolation of RNase-resistant N-glycoconjugates with RNA, and its loss  
210 upon RNA removal resemble glycoRNA digestion by RNase.

211 Therefore, we propose a simple checkpoint experiment for the relevant fields, with which one would be  
212 able to tell if the desired molecule is being studied. We suggest one treat the purified, glycan-labeled RNA  
213 samples with RNases for an extended period, and then directly load the mixture into the gel electrophoresis,  
214 without using a column to clean up the sample. With a transfer to membrane or not, the band at large molecular  
215 weight should disappear for glycoRNA. If it does not, one should be alerted that this is likely to be the RNase-  
216 resistant N-glycoconjugate.

217 The biochemical and functional nature of glycoRNA remains to be investigated. N-glycans themselves  
218 contain negatively charged moieties, such as sialic acid, phosphate, or sulfate groups <sup>29-34</sup>, which enables N-  
219 glycosylated molecules to run towards the positive electrode during gel electrophoresis and more efficient transfer  
220 to a positively charged nylon membrane. Thus, potential candidates of these molecules may be N-glycosylated  
221 oligopeptide products degraded from glycoproteins, which cannot be further cleaved by proteinase K or in which  
222 N-glycan protects peptides from further digestion by proteinase K. The possible peptidic nature of glycoRNA-  
223 associated glycosylated molecules is supported by the cleavage of an N-glycan from asparagine residues by

224 PNGase F, which requires at least a tripeptide-containing substrate<sup>35</sup>. However, it is unlikely that glycosylated  
225 molecules contain long polypeptide since proteinase K treatment did not affect the band position and intensity of  
226 glycosylated molecules during gel electrophoresis (Fig. 2e). Interestingly, a highly hydrophilic oligopeptide  
227 containing a sialylated complex-type N-glycan linked to a hexapeptide can be isolated from chicken egg yolk in  
228 considerable quantity and high homogeneity<sup>36</sup>. It is thus intriguing to ask if similar molecules also exist in  
229 mammalian cells.

230 Of general importance, our findings demonstrate that even the gold standard RNA purification methods  
231 are susceptible to seemingly inert molecules such as glycans which are not easily detected by conventional  
232 means. It should be brought to the attention that co-isolation of other biomolecules with extracted nucleic acids  
233 are not uncommon. For example, anti-coagulant heparin often contaminates purified DNA or RNA samples from  
234 blood collection and plasma processing procedures, and such contamination can complicate reverse transcription  
235 and PCR analysis<sup>14,15</sup>. It is currently unclear how glycosylated molecules may have affected and will affect  
236 studies that have relied on conventional RNA isolation methods. Our work prompts the development of more  
237 reliable RNA purification and post-transcriptional modification methods and will serve as a catalyst for further  
238 investigation into a potentially novel biomolecule.

239

## 240 **METHODS**

### 241 **Key resources table**

| Reagent or resource                                                                                              | Source               | Identifier        |
|------------------------------------------------------------------------------------------------------------------|----------------------|-------------------|
| <b>Chemicals, peptides, and recombinant proteins</b>                                                             |                      |                   |
| Dulbecco's Modified Eagle's Medium (DMEM), high glucose with L-glutamine, sodium pyruvate and sodium bicarbonate | Welgene              | Cat# LM001-17     |
| Dulbecco's Modified Eagle's Medium (DMEM)                                                                        | Gibco                | Cat# 41965-039    |
| Fetal bovine serum                                                                                               | Welgene              | Cat# S001-01      |
| Fetal bovine serum                                                                                               | Sigma-Aldrich        | Cat# F7524        |
| HyClone Characterized Fetal Bovine Serum                                                                         | Cytiva               | Cat# SH30071.03HI |
| Penicillin/streptomycin                                                                                          | Sigma-Aldrich        | Cat# P4458        |
| Dulbecco's modified phosphate buffered saline (D-PBS), without calcium chloride and magnesium chloride           | Welgene              | Cat# LB001-02     |
| Phosphate buffered saline (PBS)                                                                                  | In-house preparation |                   |
| Dimethyl sulfoxide (DMSO)                                                                                        | Sigma-Aldrich        | Cat# 276855       |
| Dimethyl sulfoxide (DMSO)                                                                                        | Merck                | Cat# 1.0295.1000  |
| N-azidoacetylmannosamine-tetraacylated (Ac <sub>4</sub> ManNAz)                                                  | Sigma-Aldrich        | Cat# 900917-50MG  |

|                                                                 |                              |                 |
|-----------------------------------------------------------------|------------------------------|-----------------|
| N-azidoacetylmannosamine-tetraacylated (Ac <sub>4</sub> ManNAz) | Custom synthesis by Synvenio |                 |
| TRIZol™ Reagent                                                 | Thermo Fisher Scientific     | Cat# 15596018   |
| TRI Reagent™ Solution                                           | Thermo Fisher Scientific     | Cat# AM9738     |
| TRIZol™ LS Reagent                                              | Thermo Fisher Scientific     | Cat# 10296028   |
| Chloroform                                                      | Sigma-Aldrich                | Cat# C2432      |
| TURBO™ DNase (2 U/μL)                                           | Thermo Fisher Scientific     | Cat# AM2238     |
| DNase I (RNase free; 2U/μl)                                     | Thermo Fisher Scientific     | Cat# AM2222     |
| RNase A (DNase and protease-free, 10 mg/mL)                     | Thermo Fisher Scientific     | Cat# EN0531     |
| PureLink™ RNase A (20 mg/mL)                                    | Thermo Fisher Scientific     | Cat# 12091021   |
| Rapid PNGase F                                                  | New England Biolabs          | Cat# P0710S     |
| α2-3,6,8,9 Neuraminidase A                                      | New England Biolabs          | Cat# P0722S     |
| Proteinase K, Recombinant, PCR grade                            | Roche                        | Cat# 3115879001 |
| Proteinase K                                                    | Thermo Fischer Scientific    | Cat# AM2548     |
| RNase T1                                                        | Thermo Fischer Scientific    | Cat# AM2283     |
| RNase cocktail                                                  | Thermo Fischer Scientific    | Cat# AM2286     |
| Benzonase® Nuclease                                             | Merck                        | Cat# E1014-25KU |
| RNase H                                                         | New England Biolabs          | Cat# M0297L     |
| Nuclease P1                                                     | New England Biolabs          | Cat# M0660S     |
| UltraPure™ Formamide                                            | Thermo Fisher Scientific     | Cat# 15515026   |
| UltraPure™ 0.5M EDTA, pH 8.0                                    | Thermo Fisher Scientific     | Cat# 15575020   |
| DEPC-Treated H <sub>2</sub> O                                   | Thermo Fisher Scientific     | Cat# AM9920     |
| Isopropanol, Optima LC/MS Grade                                 | Fisher Scientific            | Cat# A461-500   |
| Ethyl alcohol, Pure                                             | Sigma-Aldrich                | Cat# E7023-1L   |
| dibenzocyclooctyne-Cy5 (DBCO-Cy5)                               | Sigma-Aldrich                | Cat# 777374-5MG |
| dibenzocyclooctyne-PEG4-biotin (DBCO-biotin)                    | Sigma-Aldrich                | Cat# 760749-5MG |
| Linear acrylamide                                               | Thermo Fisher Scientific     | Cat# AM9520     |
| SeaKem® LE Agarose                                              | Lonza                        | Cat# 50004      |
| NorthernMax® Denaturing Gel Buffer (10X)                        | Thermo Fisher Scientific     | Cat# AM8676     |
| NorthernMax® 10X Running Buffer                                 | Thermo Fisher Scientific     | Cat# AM8671     |
| NorthernMax® Transfer Buffer                                    | Thermo Fisher Scientific     | Cat# AM8672     |
| Odyssey Blocking Buffer (PBS)                                   | Li-Cor Biosciences           | Cat# 927-40000  |
| IRDye 800CW Streptavidin                                        | Li-Cor Biosciences           | Cat# 926-32230  |
| MOPS                                                            | Sigma-Aldrich                | Cat# M1254      |



|                                                        |                          |                   |
|--------------------------------------------------------|--------------------------|-------------------|
| PBS Tablets                                            | Gibco                    | Cat# 18912-014    |
| TWEEN <sup>®</sup> 20                                  | Sigma-Aldrich            | Cat# P7949        |
| Sodium Acetate·3H <sub>2</sub> O                       | Merck                    | Cat# 1.06265.1000 |
| EDTA                                                   | Sigma-Aldrich            | Cat# EDS          |
| 37% Formaldehyde solution                              | Merck                    | Cat#1.04003.1000  |
| UltraPure™ Ethidium Bromide, 10 mg/mL                  | Thermo Fisher Scientific | Cat# 15585011     |
| Zeta-Probe <sup>®</sup> GT Membrane                    | Bio-Rad                  | Cat# 1620194      |
| BrightStar™-Plus Positively Charged Nylon Membrane     | Thermo Fisher Scientific | Cat# AM10102      |
| Hybond-C nitrocellulose membrane                       | Cytiva                   | Cat# RPN303C      |
| Amersham™ Protran <sup>®</sup> nitrocellulose membrane | Merck                    | Cat# GE10600001   |
| Ambion <sup>®</sup> 10X RNA Fragmentation Reagent      | Thermo Fisher Scientific | Cat# AM8740       |
| <b>Critical commercial assays</b>                      |                          |                   |
| NorthernMax™ Kit                                       | Thermo Fisher Scientific | Cat# AM1940       |
| RNA Clean and Concentrator 5                           | Zymo Research            | Cat# R1013        |
| <b>Experimental models: cell lines</b>                 |                          |                   |
| HeLa                                                   | ATCC                     | Cat# ATCC-CCL-2   |
| K562                                                   | ATCC                     | Cat# ATCC-CCL-24  |

242

#### 243 **Lead contact**

244 Further information and requests for resources and reagents should be directed to and will be fulfilled by the Lead  
245 Contact, Sungchul Kim (sungchulkim.kr@gmail.com).

246

#### 247 **Materials availability**

248 All unique/stable reagents generated in this study are available from the Lead Contact with a completed Materials  
249 Transfer Agreement.

250

#### 251 **Experimental Model and Subject Details**

##### 252 **Mammalian cell culture**

253 HeLa cells were cultured at 37°C and 5% CO<sub>2</sub> in Dulbecco's Modified Eagle's Medium (DMEM, Welgene, Fig.  
254 1b,c, 2b–f, 3b,c and 4b,c and Extended Data Fig. 1b,c, 2a–d, 3a and 4d,e; Gibco, Extended Data Fig. 2b) media  
255 supplemented with 10% fetal bovine serum (FBS) (Welgene, Fig. 1b,c, 2b–f 3b,c and 4b,c and Extended Data Fig.  
256 1b,c, 2a,c,d, 3a and 4d,e; Sigma-Aldrich, Extended Data Fig. 2b), and also supplemented with  
257 penicillin/streptomycin (P/S) (Sigma-Aldrich, Extended Data Fig. 2b). Cells were maintained in 100-mm cell  
258 culture dishes (Fig. 1b,c, 2b–f 3b,c and 4b,c and Extended Data Fig. 1b,c, 2a,c,d, 3a and 4d,e) with 10 mL of  
259 culture media or, in T75 flasks (Extended Data Fig. 2b). When reaching confluency, cells were split for sub-

260 culturing. K562 cells (Extended Data Fig. 4b) were cultured at 37°C and 5% CO<sub>2</sub> in RPMI medium 1640  
261 supplemented with 10% FBS (Cytiva) and P/S (Sigma-Aldrich) with shaking at 120 rpm.

262

263

## 264 **Method details**

### 265 **Labeling with metabolic chemical reporter**

266 Stocks of 500mM N-azidoacetylmannosamine-tetraacylated (Ac<sub>4</sub>ManNAz) (Sigma-Aldrich, Fig. 1b,c, 2b–f, 3b,c  
267 and 4b,c and Extended Data Fig. 1b,c, 2b–d, 3a and 4b,d,e) were prepared in sterile dimethyl sulfoxide (DMSO)  
268 (Sigma-Aldrich). For metabolic labeling, we treated Ac<sub>4</sub>ManNAz at a final concentration of 100 μM in fresh DMEM  
269 supplemented with 10% FBS. After 72 h incubation at 37°C and 5% CO<sub>2</sub>, cells were washed with Dulbecco's  
270 Phosphate-Buffered Saline (D-PBS) (Welgene, Fig. 1b,c, 2b–f, 3b,c and 4b,c and Extended Data Fig. 1b,c, 2b–d,  
271 3a and 4b,d,e) twice and stored in -80°C until total RNA extraction. For experiments shown in Extended Data Fig.  
272 4b, the conditions for metabolic labeling were the same, except for that P/S were added in the media.

273 For experiments shown in Extended Data Fig. 2b, of 50 mM stocks of Ac<sub>4</sub>ManNAz (Custom synthesis by  
274 Synvenio) were prepared in sterile DMSO (Merck). The metabolic labeling was done with 100 μM Ac<sub>4</sub>ManNAz. in  
275 the DMEM (Gibco) supplemented with 10% FBS (Sigma-Aldrich) and 1% P/S. After 48 h at 37 °C and 5% CO<sub>2</sub>,  
276 cells were washed with PBS (in-house preparation) and then followed by total RNA extraction.

277

### 278 **Total RNA extraction with TRIzol™ Reagent**

279 For experiments shown in Fig. 1b,c, 2b–f, 3b,c and 4b and 4c and Extended Data Fig. 1b,c, 2b–d, 3a and 4b,d,e,  
280 1 mL of TRIzol™ reagent (Thermo Fisher Scientific) was added directly onto a washed cell culture dish. Dishes  
281 were rocked thoroughly for 10 min at room temperature to lyse and denature all cells. For extracting total RNA  
282 from K562 cells (Extended Data Fig. 4b), the cell pellets washed twice with D-PBS were lysed in TRIzol™ reagent  
283 (Thermo Fisher Scientific) with 1 mL for ~10<sup>7</sup> cells). Homogenized TRIzol-cell mixtures were scrapped with cell  
284 scraper and then transferred into nuclease-free sterile 1.7 mL microtubes. The tubes were vortexed at least for 5  
285 min until complete homogenization for further denaturation of the intermolecular non-covalent interactions. Phase  
286 separation was initiated by adding 200 μL (0.2x volumes) of 100% chloroform (Sigma-Aldrich) into 1-mL TRIzol-  
287 dissolved cell mixture, and then vortexed thoroughly for complete homogenization. The homogenates were  
288 centrifuged at 16,000xg for 10 min at 4°C. The upper (aqueous) phase was carefully removed, transferred into a  
289 nuclease-free sterile 1.7 mL, and then mixed with equal volume of 100% isopropanol (Fisher Scientific) by  
290 vortexing. The mixture was centrifuged at 16,000xg for 30 min at 4°C, and the supernatant was carefully  
291 discarded. The pellet was washed with 1 mL of ice-cold 75% ethanol (Sigma-Aldrich) twice, and then dried  
292 completely. The RNA pellet was dissolved with Milli-Q® (Thermo Fisher Scientific, Fig. 1b,c, 2b–f, 3b,c and 4b,c  
293 and Extended Data Fig. 1b,c, 2b–d, 3a and 4b,d,e) H<sub>2</sub>O or DEPC-treated H<sub>2</sub>O (Thermo Fisher Scientific,  
294 Extended Data Fig. 4b), and the concentration was measured using a Nanodrop™ 2000 UV/Vis  
295 spectrophotometer (Thermo Fisher Scientific).

296 For experiments shown in Extended Data Fig. 2b, 6 mL of TRI Reagent Solution (Thermo Fisher

297 Scientific) was added directly to the washed T75 cell culture flask. Homogenates were vortexed for 1 min at RT  
298 followed by incubating the samples 1 min at 37°C. 0.2x volumes of chloroform were added, and phase separation  
299 was performed at 16,000xg for 10 min at RT. After adding equal volume of isopropanol, mixtures were incubated  
300 for 10 min at 4°C. RNA was precipitated at 16,000xg for 10 min at 4°C, washed twice with 75% ethanol and  
301 dissolved in nuclease-free H<sub>2</sub>O. To obtain highly pure RNA preparations, The isolated RNA was re-purified by  
302 adding 1 ml of TRI Reagent Solution (Thermo Fisher Scientific) and repeating the isolation procedure described  
303 above.

304

### 305 **Copper-free click chemistry and removal of free ligands**

306 Strain-promoted alkyne-azide cycloadditions (SPAAC) was performed to probe for azide-containing sialo-  
307 conjugates in RNA samples using dibenzocyclooctyne-conjugated cyanine 5 (DBCO-Cy5) (Sigma-Aldrich) dyes or  
308 DBCO-biotin (Sigma-Aldrich) as the alkyne-azide cycloaddition. Stocks of 10 mM DBCO-Cy5 or DBCO-biotin  
309 were made by dissolving 1 mg of lyophilized DBCO-Cy5 in 82.6 µL or 5 mg of DBCO-biotin in 666.7 µL of DMSO,  
310 respectively. 9 µL (typically ~50 µg) of RNA dissolved in H<sub>2</sub>O were mixed at first with 10 µL of home-made 2x dye-  
311 free RNA loading buffer (df-RLB, 95% formamide, 25 mM EDTA, pH8.0) and added with 1 µL of 10 mM (for final  
312 500 µM) DBCO-Cy5 or DBCO-biotin in a microtube. Samples were incubated at 55°C for 10 min. The reaction  
313 was stopped by adding 1 mL of TRIzol™ reagent (Thermo Fisher Scientific) and 200 µL of chloroform (Sigma-  
314 Aldrich). Alternatively, for experiments performed in Extended Data Fig. 2b, dye removal was achieved by adding  
315 80 µL of DEPC-treated H<sub>2</sub>O, 300µL of TRIzol LS Reagent (Thermo Fisher Scientific) and 80 µL of Chloroform  
316 (Merck). Samples were centrifuged at 16,000xg for 10 min at 4°C or, for experiments shown in Extended Data Fig.  
317 2b, at 16,000xg for 5 min at room temperature. The upper (aqueous) phase was carefully removed, transferred  
318 into a nuclease-free sterile tube. For Fig. 1b,c, 2b–f, 3b,c and 4b,c and Extended Data Fig. 1b,c, 2a–d, 3a and  
319 4b,d,e, samples were mixed with equal volume of 100% isopropanol by vortexing, subsequently centrifuged at  
320 16,000xg for 30 min at 4°C, and the supernatant was carefully discarded. The pellet was washed with 1 mL of ice-  
321 cold 75% ethanol twice, and then dried completely. The RNA pellet was dissolved with Milli-Q® H<sub>2</sub>O (Fig. 1b,c, 2b–  
322 f, 3b,c and 4b,c and Extended Data Fig. 1b,c, 2a–d, 3a and 4d,e) or DEPC-treated H<sub>2</sub>O (Extended Data Fig. 4b),  
323 and the concentration was measured using the UV/Vis spectrophotometer.

324

### 325 **Enzymatic reactions**

326 Typically, enzymatic reactions were performed with 10 µg (Fig. 2b–f, 3b,c and 4b,c and Extended Data Fig. 1c,  
327 2a–d, 3a and 4b) or 12 µg (Extended Data Fig. 2b) of labeled RNA at 37°C. To digest RNA, 0.5 µL of RNase A  
328 (DNase and protease-free, 10 mg/mL) (Thermo Fisher Scientific, Fig. 2b–f, 3b,c and 4b,c Extended Data Fig. 1c,  
329 2a–d, 3a and 4b; PureLink™ RNase A (20 mg/mL) (Thermo Fisher Scientific, Extended Data Fig. 4b), or 1 µL of  
330 RNase T1 (Thermo Fisher Scientific, Fig. 2f and Extended Data Fig. 2c,d), or 1 µL of RNase cocktail (500 U of  
331 RNase A and 20,000 U of RNase T1 per mL) (Thermo Fisher Scientific, Fig. 2f and Extended Data Fig. 2c,d) were  
332 treated with 1.5 µL of 10x TURBO DNase buffer (Thermo Fisher Scientific) in the sample by adjusting with Milli-Q  
333 H<sub>2</sub>O to total 15 µL. To degrade DNA, 0.5 µL of TURBO DNase (2,000 U/mL) (Thermo Fisher Scientific, Fig. 2b–f

334 and Extended Data Fig. 1c and 2a,c,d) or DNase I (2,000 U/mL) (Thermo Fisher Scientific, Extended Data Fig. 2b)  
335 were treated with 1.5  $\mu$ L of 10 $\times$  DNase buffer in the sample by adjusting with Milli-Q H<sub>2</sub>O to total 15  $\mu$ L. To digest  
336 both RNA and DNA, 1  $\mu$ L of benzonase (250,000 U/mL) (Merck, Fig. 2f and Extended Data Fig. 2c,d) or 1  $\mu$ L of  
337 nuclease P1 (100,000 U/mL) (New England Biolabs, Fig. 2f and Extended Data Fig. 2c,d) were treated with 1.5 of  
338 10 $\times$  TURBO DNase buffer or nuclease P1 buffer in the sample by adjusting with Milli-Q H<sub>2</sub>O to total 15  $\mu$ L. To  
339 digest RNA in DNA/RNA hybrids, 1  $\mu$ L of RNase H (5,000 U/mL) (New England Biolabs, Fig. 2f and Extended  
340 Data Fig. 2c,d) were treated with 1.5 of 10 $\times$  RNase H buffer in the sample by adjusting with Milli-Q H<sub>2</sub>O to total 15  
341  $\mu$ L. To digest N-glycans, 0.5  $\mu$ L of Rapid PNGase F (New England Biolabs, Fig. 2d and Extended Data Fig. 2a)  
342 were added with 1.5  $\mu$ L of 10 $\times$  PNGase F buffer (New England Biolabs) in the sample by adjusting with Milli-Q  
343 H<sub>2</sub>O to total 15  $\mu$ L. To cut sialic acid moieties, 0.5 of  $\alpha$ 2-3,6,8,9 Neuraminidase A (New England Biolabs, Fig. 2d  
344 and Extended Data Fig. 2a,b) were added with 1.5  $\mu$ L of 10 $\times$  GlycoBuffer 1 (New England Biolabs) in the sample  
345 by adjusting with Milli-Q H<sub>2</sub>O to total 15  $\mu$ L. To digest proteins, 1  $\mu$ L of proteinase K (PK, Roche, 20 mg/mL  
346 dissolved in Milli-Q H<sub>2</sub>O, Fig. 1b,c, 2d–f, 3b,c and 4b,c and Extended Data Fig. 1b,c, 2a–d, 3a and 4b; Thermo  
347 Fischer Scientific, 20 mg/mL, Extended Data Fig. 2b) was added either with 1.5  $\mu$ L of 10 $\times$  TURBO DNase buffer  
348 in the RNA sample by adjusting with Milli-Q H<sub>2</sub>O to total 15  $\mu$ L or directly in the precedent enzymatic reactant. The  
349 incubation was done for 30 min or 60 min in cases, but all the results always exhibited complete protein digestion.

350

#### 351 **RNA fragmentation**

352 DBCO-Cy5-labeled RNA was fragmented using Ambion<sup>®</sup> 10X RNA Fragmentation Reagent (Thermo Fisher  
353 Scientific). Samples were incubated in 1 $\times$  RNA Fragmentation Reagent at 75°C for 15 min for mild reaction  
354 (Extended Data Fig. 4d) and at 95°C for 2 h for complete fragmentation (Extended Data Fig. 4e). Fragmented  
355 RNA samples were immediately mixed with 2 $\times$  volumes of RBB and various volumes of 100% ethanol for each  
356 sample for the final 40%, 50%, 60% and 70% ethanol as indicated in Extended Data Fig. 4d,e.

357

#### 358 **RNA clean-up by acidic phenol-chloroform extraction**

359 For experiments in Fig. 2b,d,f and Extended Data Fig. 2a,c,d, enzymatically digested samples were mixed  
360 thoroughly with 1 mL of TRIzol reagent and 200  $\mu$ L of 100% chloroform (Sigma-Aldrich) for 10 min at room  
361 temperature. The homogenates were centrifuged at 16,000 $\times$ g for 10 min at 4°C. The upper phase was carefully  
362 removed, transferred into a nuclease-free sterile 1.7-mL tube, and then mixed with 1  $\mu$ L of linear acrylamide  
363 (Thermo Fisher Scientific) as a co-precipitant and equal volume of 100% isopropanol by vortexing, subsequently  
364 centrifuged at 16,000 $\times$ g for 30 min at 4°C, and the supernatant was carefully discarded. The pellet was washed  
365 with 1 mL of ice-cold 75% ethanol twice, and then dried completely. The pellet was dissolved with Milli-Q<sup>®</sup> H<sub>2</sub>O.  
366 For experiments in Extended Data Fig. 2b, 20  $\mu$ g linear acrylamide and TRI Reagent Solution (Thermo Fisher  
367 Scientific) were used.

368

#### 369 **RNA clean-up and size fractionation by silica-based column purification**

370 16  $\mu$ L of PK-digested samples were mixed with 34  $\mu$ L of Milli-Q H<sub>2</sub>O to total 50  $\mu$ L. 100  $\mu$ L of RBB and 150  $\mu$ L of

371 100% ethanol (Final 50% ethanol) were added by reverse pipetting and vortexed thoroughly. For experiments  
372 shown in Extended Data Fig. 2b, the final percentage of EtOH was 60%. The mixtures were transferred into the  
373 Zymo-Spin™ IC Column in a 2 mL of collection tube. The columns were centrifuged at 16,000×g for 30 sec at  
374 room temperature and the flow-through was discarded. 400 µL of RNA Prep Buffer (RPB) (provided by RNA Clean  
375 & Concentrator-5, Zymo Research) were added into the column and then centrifuged at 16,000×g for 30 sec at  
376 room temperature followed by discarding the flow-through. 700 µL of RNA Wash Buffer (RWB) (provided by RNA  
377 Clean & Concentrator-5, Zymo Research) were added into the column and then centrifuged at 16,000×g for 30  
378 sec at room temperature followed by discarding the flow-through. Add 400 µL of RWB were added into the column  
379 and then centrifuged at 16,000×g for 30 sec at room temperature followed by discarding the flow-through.  
380 Centrifuge at 16,000×g for 1 min at room temperature again to ensure complete removal of the RWB. The  
381 columns were carefully transferred into a new nuclease-free sterile 1.7-mL tube, and 15 µL of Milli-Q H<sub>2</sub>O or  
382 DEPC-treated H<sub>2</sub>O directly to the column matrix and incubate for 3 min. The elution was done by centrifuge at  
383 16,000×g for 3 min at room temperature.

384 For size fractionation of small (smaller than about 200 nucleotides) versus large (larger than about 200  
385 nucleotides) RNAs, samples mixed with equal volume of 50% RBB in 100% ethanol. The mixture was applied  
386 onto the Zymo-Spin™ IC Column and centrifuged at 16,000×g for 1 min at room temperature. Large RNAs  
387 bound in the column were purified as described above. Small RNAs in the flow-through were mixed with equal  
388 volume of 100% ethanol and then purified as described above.

389

#### 390 **Denaturing gel electrophoresis, membrane transfer, and blotting**

391 Typically, formaldehyde-denaturing 1% agarose gel was made by the following. 0.5 g of agarose powder (Lonza)  
392 were mixed in 45 mL of Milli-Q H<sub>2</sub>O in the flask by swirling but thoroughly. The flask was heated in the microwave  
393 oven until complete melting of the agarose. The flask was removed from the oven and then cooled to 55–60°C. 5  
394 mL of 10× NorthernMax™ Denaturing Gel Buffer (Thermo Fisher Scientific) were added and mixed by swirling in  
395 the fume hood. The gel mixture was casted following the instruction provided by the casting apparatus. To prepare  
396 loading samples, samples were mixed with equal volume of 2× df-RLB, and then incubated at 95°C for 10 min.  
397 The gel was resolved in 1× NorthernMax™ Running Buffer (Thermo Fisher Scientific) at 100 V for 40–50 min. For  
398 visualization of the Cy5 fluorescence, the gel was rinsed briefly with Milli-Q H<sub>2</sub>O and scanned using the gel  
399 imaging system (Bio-Rad ChemiDoc XRS+) in the Cy5 filter channel. For ethidium bromide (EtBr) scanning, the  
400 Cy5 scanned gel was stained in the water-dissolved UltraPure™ EtBr (Thermo Fisher Scientific) solution for 30  
401 min at room temperature by rocking. The gel was rinsed with Milli-Q H<sub>2</sub>O for 30 min at room temperature by  
402 rocking and then scanned in the gel imaging system.

403 For experiments shown in Extended Data Fig. 2b, 1 g of agarose powder (Roche) was dissolved in 72  
404 mL of Milli-Q H<sub>2</sub>O. 10 mL of 10× MOPS buffer (200 mM MOPS, 50 mM sodium Acetate·3H<sub>2</sub>O, 10 mM EDTA, pH  
405 7.0) and 18 mL 37% formaldehyde (Merck) were added and mixed. Purified, enzyme treated, RNA samples were  
406 incubated at 95 °C for 5 min followed by a quick transfer and 5 min incubation on ice before gel electrophoresis at  
407 90V. Cy5 fluorescence was visualized using the Amersham Typhoon scanner (GE Healthcare).

408 For membrane transfer, the electrophoresed gel was scanned in the Cy5 channel and then immediately  
409 subjected to the transfer instead of EtBr staining, since the EtBr emission was strongly overlapped with Cy5  
410 visualization during the downstream membrane scanning. NorthernMax™ Transfer Buffer (Thermo Fisher  
411 Scientific) was used following the manufacturer's instruction for 2 h. For nylon membranes, Zeta-Probe® GT (Bio-  
412 Rad) or BrightStar™-Plus (Thermo Fisher Scientific) membranes were used. For nitrocellulose membranes,  
413 Hybond-C (Cytiva) or Amersham™ Protran® (Sigma-Aldrich) membranes were used. The transferred membranes  
414 were rinsed briefly with Milli-Q H<sub>2</sub>O and scanned immediately in the Cy5 channel using Bio-Rad ChemiDoc XRS+.

415 After transfer of the gel run with biotinylated samples, membranes were subjected to blocked with  
416 Odyssey Blocking Buffer, PBS (Li-Cor Biosciences) for 45 min at room temperature, by skipping EtBr staining and  
417 fluorescent imaging. After blocking, membranes were stained for 30 min at room temperature with streptavidin-  
418 conjugated IR800 (Li-Cor Biosciences), which was diluted to 1:5,000 in Odyssey Blocking Buffer. Excess IR800-  
419 streptavidin was washed from the membranes by four times with 0.1% TWEEN-20 (Sigma-Aldrich) in 1× PBS for  
420 10 min/each at room temperature. Membranes were finally washed once with 1× PBS to remove residual  
421 TWEEN-20 before scanning. Fluorescent signals from membranes were scanned on Odyssey Li-Cor Sa scanner  
422 (Li-Cor Biosciences) with the software set to auto-detect the signal intensity for both 700 and 800 channels. After  
423 scanning, images were adjusted to appropriate contrasts with the Li-Cor software (when appropriate) in the 800  
424 channel and exported.

425

#### 426 **Acknowledgements**

427 This work was supported by Young Scientist Fellowship program of the Institute for Basic Science from the  
428 Ministry of Science and ICT of Korea (IBS-R008-D1 to S.K.); by TU Delft-Leiden Health Initiative (V.R, C.J.); by a  
429 Dutch Research council (NWO) ENW-XS grant (OCENW.XS21.4.046 to P.M.); by ERC Consolidator grant of the  
430 European Research Council (819299 to C.J.).

431

#### 432 **Authors contributions**

433 S.K. and Z.L. made the initial discovery. S.K., C.J. and Z.L. designed the study. S.K., Z.L., P.M., and C.J. jointly  
434 supervised the work. S.K., Y.C., K.J., A.P, and Z.L. performed the experiments. S.K., K.J., Z.L., P.M., and C.J  
435 wrote the manuscript with input from all authors.

436

#### 437 **Declaration of interests**

438 The authors declare no competing interests.

439

#### 440 **References**

- 441 1 Flynn, R. A. *et al.* Small RNAs are modified with N-glycans and displayed on the surface of living cells. *Cell*  
442 **184**, 3109-3124 e3122, doi:10.1016/j.cell.2021.04.023 (2021).
- 443 2 Esmail, S. & Manolson, M. F. Advances in understanding N-glycosylation structure, function, and regulation  
444 in health and disease. *Eur J Cell Biol* **100**, 151186, doi:10.1016/j.ejcb.2021.151186 (2021).

- 445 3 Stanley, P., Moremen, K. W., Lewis, N. E., Taniguchi, N. & Aebi, M. in *Essentials of Glycobiology* (eds A.  
446 Varki *et al.*) 103-116 (2022).
- 447 4 Ma, Y. *et al.* Spatial imaging of glycoRNA in single cells with ARPLA. *Nat Biotechnol*, doi:10.1038/s41587-  
448 023-01801-z (2023).
- 449 5 Zhang, N. *et al.* Cell surface RNAs control neutrophil recruitment. *Cell*, doi:10.1016/j.cell.2023.12.033 (2024).
- 450 6 Zhang, X. & Zhang, Y. Applications of azide-based bioorthogonal click chemistry in glycobiology. *Molecules*  
451 **18**, 7145-7159, doi:10.3390/molecules18067145 (2013).
- 452 7 Pedowitz, N. J. & Pratt, M. R. Design and Synthesis of Metabolic Chemical Reporters for the Visualization  
453 and Identification of Glycoproteins. *RSC Chem Biol* **2**, 306-321, doi:10.1039/d1cb00010a (2021).
- 454 8 Moons, S. J., Adema, G. J., Derks, M. T., Boltje, T. J. & Bull, C. Sialic acid glycoengineering using N-  
455 acetylmannosamine and sialic acid analogs. *Glycobiology* **29**, 433-445, doi:10.1093/glycob/cwz026 (2019).
- 456 9 Saxon, E. & Bertozzi, C. R. Cell surface engineering by a modified Staudinger reaction. *Science* **287**, 2007-  
457 2010, doi:10.1126/science.287.5460.2007 (2000).
- 458 10 Jacobs, C. L. *et al.* Metabolic labeling of glycoproteins with chemical tags through unnatural sialic acid  
459 biosynthesis. *Methods Enzymol* **327**, 260-275, doi:10.1016/s0076-6879(00)27282-0 (2000).
- 460 11 Chomczynski, P. & Sacchi, N. Single-step method of RNA isolation by acid guanidinium thiocyanate-phenol-  
461 chloroform extraction. *Anal Biochem* **162**, 156-159, doi:10.1006/abio.1987.9999 (1987).
- 462 12 Chomczynski, P. & Sacchi, N. The single-step method of RNA isolation by acid guanidinium thiocyanate-  
463 phenol-chloroform extraction: twenty-something years on. *Nat Protoc* **1**, 581-585, doi:10.1038/nprot.2006.83  
464 (2006).
- 465 13 Boom, R. *et al.* Rapid and simple method for purification of nucleic acids. *J Clin Microbiol* **28**, 495-503,  
466 doi:10.1128/jcm.28.3.495-503.1990 (1990).
- 467 14 Bai, X., Fischer, S., Keshavjee, S. & Liu, M. Heparin interference with reverse transcriptase polymerase  
468 chain reaction of RNA extracted from lungs after ischemia-reperfusion. *Transpl Int* **13**, 146-150,  
469 doi:10.1007/s001470050306 (2000).
- 470 15 Beutler, E., Gelbart, T. & Kuhl, W. Interference of heparin with the polymerase chain reaction. *Biotechniques*  
471 **9**, 166 (1990).
- 472 16 Khandjian, E. W. UV crosslinking of RNA to nylon membrane enhances hybridization signals. *Mol Biol Rep*  
473 **11**, 107-115, doi:10.1007/BF00364822 (1986).
- 474 17 Miribel, L. & Arnaud, P. Electrotransfer of proteins following polyacrylamide gel electrophoresis. Nitrocellulose  
475 versus nylon membranes. *J Immunol Methods* **107**, 253-259, doi:10.1016/0022-1759(88)90226-8 (1988).
- 476 18 Maley, F., Trimble, R. B., Tarentino, A. L. & Plummer, T. H., Jr. Characterization of glycoproteins and their  
477 associated oligosaccharides through the use of endoglycosidases. *Anal Biochem* **180**, 195-204,  
478 doi:10.1016/0003-2697(89)90115-2 (1989).
- 479 19 Iwamori, M., Ohta, Y., Uchida, Y. & Tsukada, Y. Arthrobacter ureafaciens sialidase isoenzymes, L, M1 and M2,  
480 cleave fucosyl GM1. *Glycoconj J* **14**, 67-73, doi:10.1023/a:1018513015459 (1997).
- 481 20 Volkin, E. & Cohn, W. E. On the structure of ribonucleic acids. II. The products of ribonuclease action. *J Biol*

- 482 *Chem* **205**, 767-782 (1953).
- 483 21 Pace, C. N., Heinemann, U., Hahn, U. & Saenger, W. Ribonuclease T1: structure, function, and stability.  
484 *Angewandte Chemie International Edition in English* **30**, 343-360 (1991).
- 485 22 Miller, M. D., Tanner, J., Alpaugh, M., Benedik, M. J. & Krause, K. L. 2.1 A structure of Serratia endonuclease  
486 suggests a mechanism for binding to double-stranded DNA. *Nat Struct Biol* **1**, 461-468,  
487 doi:10.1038/nsb0794-461 (1994).
- 488 23 Moelling, K., Broecker, F. & Kerrigan, J. E. RNase H: specificity, mechanisms of action, and antiviral target.  
489 *Methods Mol Biol* **1087**, 71-84, doi:10.1007/978-1-62703-670-2\_7 (2014).
- 490 24 Fujimoto, M., Kuninaka, A. & Yoshino, H. Purification of a Nuclease from *Penicillium citrinum*. *Agricultural and*  
491 *Biological Chemistry* **38**, 777-783, doi:10.1080/00021369.1974.10861230 (1974).
- 492 25 Hu, W. P., Chen, Y. C. & Chen, W. Y. Improve sample preparation process for miRNA isolation from the  
493 culture cells by using silica fiber membrane. *Sci Rep* **10**, 21132, doi:10.1038/s41598-020-78202-8 (2020).
- 494 26 Hemberger, H. *et al.* Rapid and sensitive detection of native glycoRNAs. *bioRxiv*, 2023.2002.2026.530106,  
495 doi:10.1101/2023.02.26.530106 (2023).
- 496 27 Perr, J. *et al.* RNA binding proteins and glycoRNAs form domains on the cell surface for cell penetrating  
497 peptide entry. *bioRxiv*, 2023.2009.2004.556039, doi:10.1101/2023.09.04.556039 (2023).
- 498 28 Li, J. *et al.* Novel Approach to Enriching Glycosylated RNAs: Specific Capture of GlycoRNAs via Solid-Phase  
499 Chemistry. *Anal Chem* **95**, 11969-11977, doi:10.1021/acs.analchem.3c01630 (2023).
- 500 29 Wang, J. R. *et al.* A method to identify trace sulfated IgG N-glycans as biomarkers for rheumatoid arthritis.  
501 *Nat Commun* **8**, 631, doi:10.1038/s41467-017-00662-w (2017).
- 502 30 Sola, R. J. & Griebenow, K. Effects of glycosylation on the stability of protein pharmaceuticals. *J Pharm Sci*  
503 **98**, 1223-1245, doi:10.1002/jps.21504 (2009).
- 504 31 Kang, J. Y. *et al.* Lysosomal Targeting Enhancement by Conjugation of Glycopeptides Containing Mannose-  
505 6-phosphate Glycans Derived from Glyco-engineered Yeast. *Sci Rep* **8**, 8730, doi:10.1038/s41598-018-  
506 26913-4 (2018).
- 507 32 Park, H. *et al.* Four unreported types of glycans containing mannose-6-phosphate are heterogeneously  
508 attached at three sites (including newly found Asn 233) to recombinant human acid alpha-glucosidase that is  
509 the only approved treatment for Pompe disease. *Biochem Biophys Res Commun* **495**, 2418-2424,  
510 doi:10.1016/j.bbrc.2017.12.101 (2018).
- 511 33 She, Y. M., Li, X. & Cyr, T. D. Remarkable Structural Diversity of N-Glycan Sulfation on Influenza Vaccines.  
512 *Anal Chem* **91**, 5083-5090, doi:10.1021/acs.analchem.8b05372 (2019).
- 513 34 She, Y. M., Farnsworth, A., Li, X. & Cyr, T. D. Topological N-glycosylation and site-specific N-glycan sulfation  
514 of influenza proteins in the highly expressed H1N1 candidate vaccines. *Sci Rep* **7**, 10232,  
515 doi:10.1038/s41598-017-10714-2 (2017).
- 516 35 Fan, J. Q. & Lee, Y. C. Detailed studies on substrate structure requirements of glycoamidases A and F. *J Biol*  
517 *Chem* **272**, 27058-27064, doi:10.1074/jbc.272.43.27058 (1997).
- 518 36 Liu, L., Prudden, A. R., Bosman, G. P. & Boons, G. J. Improved isolation and characterization procedure of



519 sialylglycopeptide from egg yolk powder. *Carbohydr Res* **452**, 122-128, doi:10.1016/j.carres.2017.10.001  
520 (2017).

## 521 **Figure legends**

### 522 **Figure 1. Glycosylated molecules copurified with glycoRNA are insensitive to RNase treatment**

523 **a.** Schematic of an improved experimental procedure for labeling and visualization. **b.** Glycan detection in Cy5  
524 channel from a denaturing agarose gel without any enzymatic treatment condition. Dimethyl sulfoxide (DMSO)  
525 was used as an Ac<sub>4</sub>ManNAz untreated control. Ethidium bromide (EtBr) channel imaged on the gel scanner  
526 shows RNAs were intact. **c.** Glycan visualization in total RNA from HeLa cells or size fractionated RNAs.

527

### 528 **Figure 2. RNase sensitivity of glycosylated molecules depends on the RNA extraction method**

529 **a.** Schematic comparison of early-click and late-click protocols. **b.** Glycan detection by early-click and late-click  
530 methods. The asterisk indicates the presence of labeled peptide contaminants (see panel **e**) **c.** Schematic  
531 representation of experiments in Fig. 2d and 2e. **d.** Comparison of RNA clean-up steps between silica column  
532 and TRIzol protocols for glycan visualization. DBCO-Cy5 labeled RNA samples were reacted with TURBO  
533 DNase or RNase A or Rapid PNGase F or  $\alpha$ 2-3,6,8,9 neuraminidase A. Data represent one of three replicates. **e.**  
534 Glycan visualization with or without proteinase K treatment. **f.** Blotting of biotinylated glycosylated molecules  
535 treated with various nucleases using streptavidin-conjugated IR800 dyes on the nitrocellulose membrane. Right,  
536 gel image of EtBr-stained RNA samples. Left, fluorescent image using IR800-streptavidin in 800-nm channel.

537

### 538 **Figure 3. Ethanol percentage and RNA existence are critical for glycosylated molecule binding onto** 539 **silica column**

540 **a.** Schematic of glycan visualization protocol for various ethanol or isopropanol percentage in silica column  
541 binding solutions. **b.** Glycan detection in 20–80% ranges of ethanol or isopropanol by 10% increments. **c.**  
542 Glycan detection in 40–70% ranges of ethanol by 3% increments.

543

### 544 **Figure 4. RNA is the co-binder of glycosylated molecules during silica column purification**

545 **a.** Schematic of glycan visualization protocol for RNA or DNA addition in silica column binding solutions. 5  
546  $\mu$ g of total RNA extracted from Ac<sub>4</sub>ManNAz-treated HeLa cells were subjected to click chemistry per  
547 sample. **b.** Glycan detection without or with total RNA addition in RNA-depleted samples. The amounts of  
548 added total RNAs extracted from DMSO-treated HeLa cells are indicated. The range of the ethanol  
549 concentrations is 40–70%. **c.** Glycan detection without or with plasmid DNA addition in RNA-depleted  
550 samples. The amounts of added plasmid DNA are indicated. The range of the ethanol concentration is 40–  
551 70%.

552

## 553 **Extended Data Figure Legends**

### 554 **Extended Data Fig. 1. Membrane transfer assay for glycan detection, related to Figure 1**

555 **a.** Schematic of the protocol. **b.** Glycan detection in formaldehyde-denaturing agarose gels and transferred

556 membranes. For nylon membrane, ZetaProbe GT™ from Bio-Rad™ was used. For nitrocellulose  
557 membrane, Hybond C™ from Amersham™ was used. **c.** Glycan detection in gels and transferred  
558 membranes with RNase or DNase treatments. For nylon membrane, BrightStar-Plus™ from Invitrogen™  
559 was used. For nitrocellulose membrane, Protran™ from Amersham™ was used.

560

561 **Extended Data Fig. 2. Comparison between silica-based column and TRIzol purification for the last**  
562 **clean-up step, related to Figure 2**

563 **a.** Data represent other two replicates done in Fig. 2d. **b.** Independent comparison from Miesen's  
564 experiments for the effect of TRI Reagent and silica column purification on recovery. Final RNA purification  
565 in the silica column was performed at 60% EtOH. DNase I was used as an alternative for DNA degradation.  
566 **c.** Glycan detection after various nucleases. **d.** Blotting of biotinylated glycans using streptavidin-  
567 conjugated IR800 dyes on the nylon membrane. Right, gel image of EtBr-stained RNA samples. Left,  
568 fluorescent image using IR800-streptavidin in 800-nm channel.

569

570 **Extended Data Fig. 3. Recovery of glycosylated molecules at various ethanol percentages, related**  
571 **to Figure 3**

572 **a.** Data represent other two replicates done in Fig. 3c. **b.** Relative glycan intensity calculated from the data  
573 points in Fig. 3c and Extended Data Fig. 3a. Error bars represent s.d.

574

575 **Extended Data Fig. 4. Added RNA but not DNA improves the recovery rate of glycosylated**  
576 **molecules in RNA-depleted conditions, related to Figure 4**

577 **a.** Schematic for the experiment in Extended Data Fig. 4b. **b.** Data from the Li's experiment. Total RNA  
578 extracted from K562 cells was used as an alternative for added HeLa total RNA. **c.** Schematic for  
579 experiments in Extended Data Fig. 4d and 4e. **d.** Glycan recovery by the added RNA in the mild RNA  
580 fragmentation condition. Partially fragmented RNAs are indicated in EtBr channel. **e.** Glycan recovery by  
581 the added RNA in the complete RNA fragmentation condition

582

# Figure 1

## a

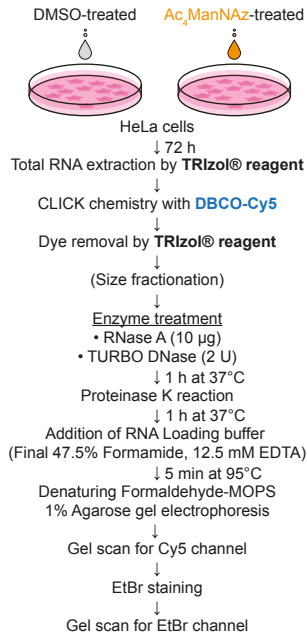

## b

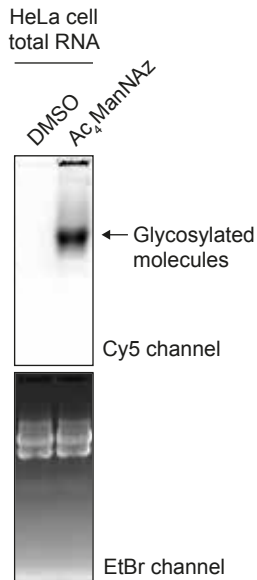

## c

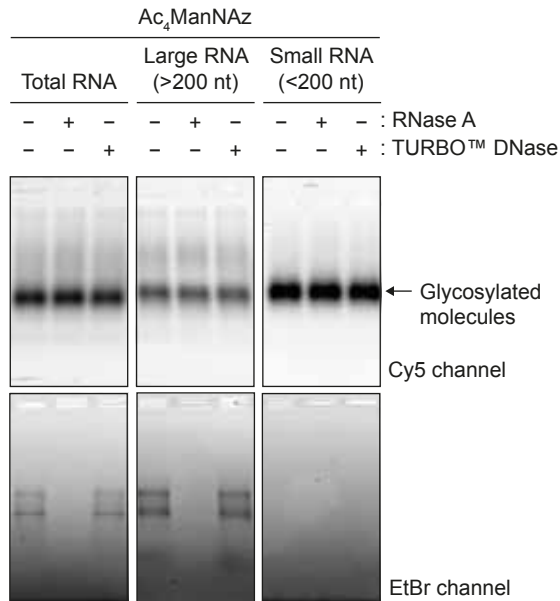

**Figure 2****a**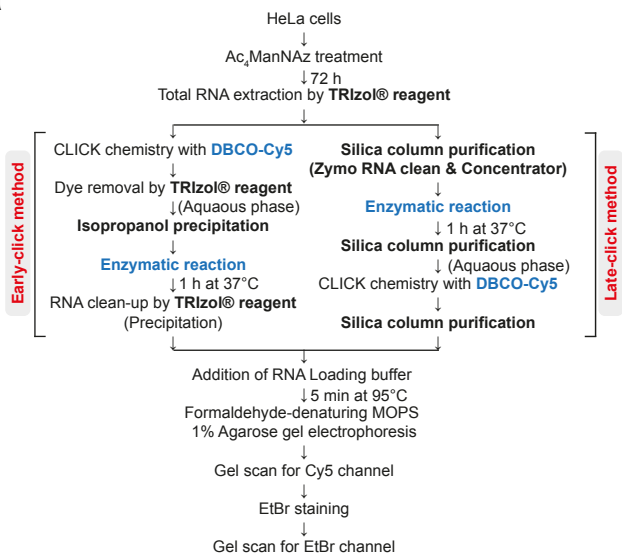**b**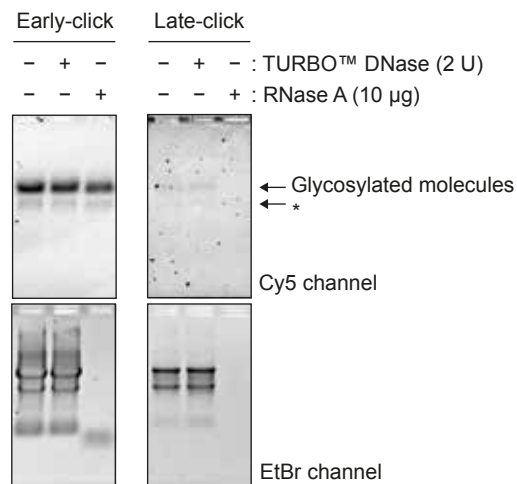**c**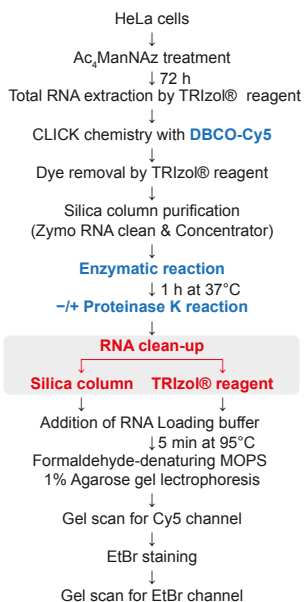**d**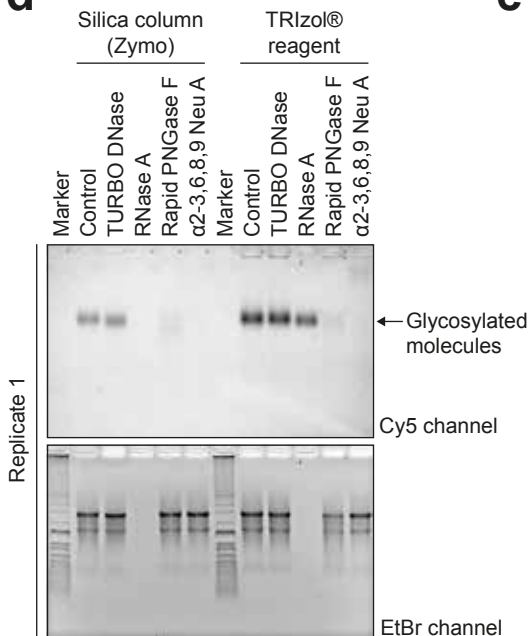**e**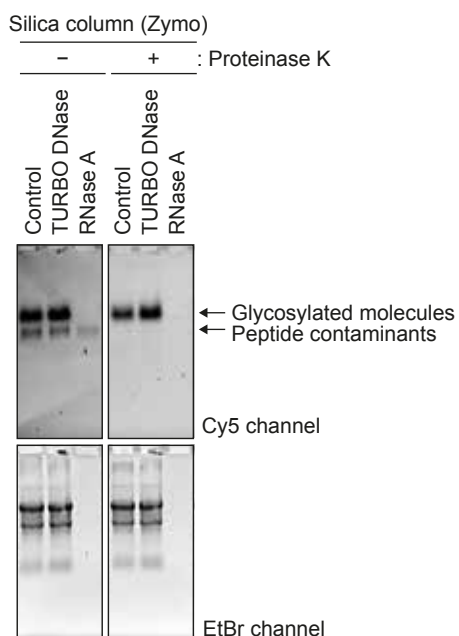**f**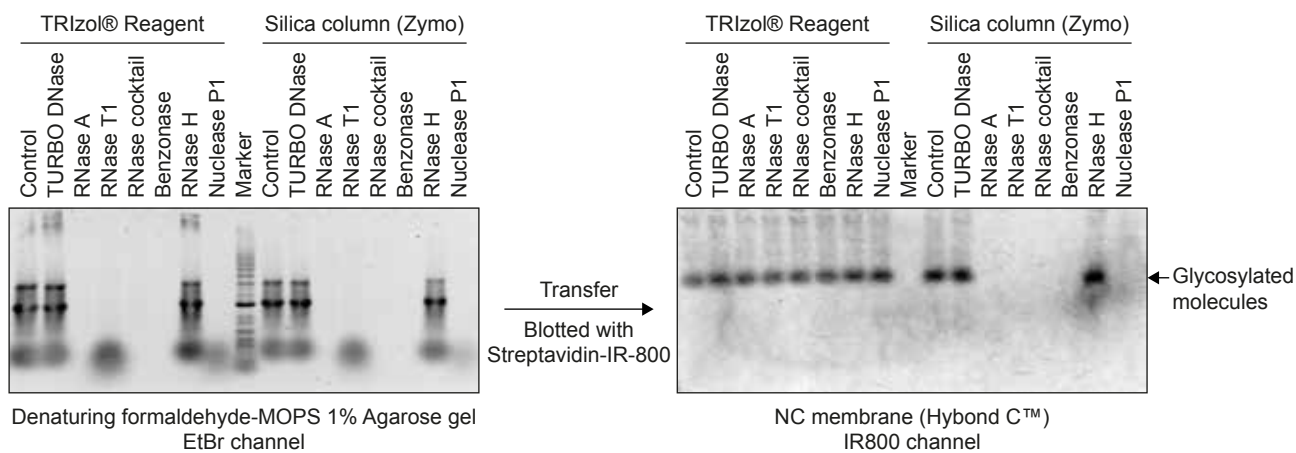



**Figure 4****a**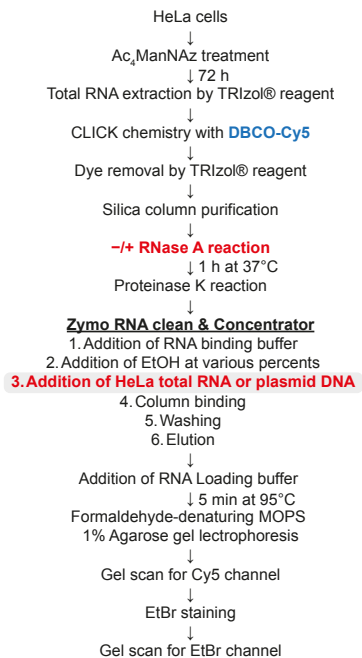**b**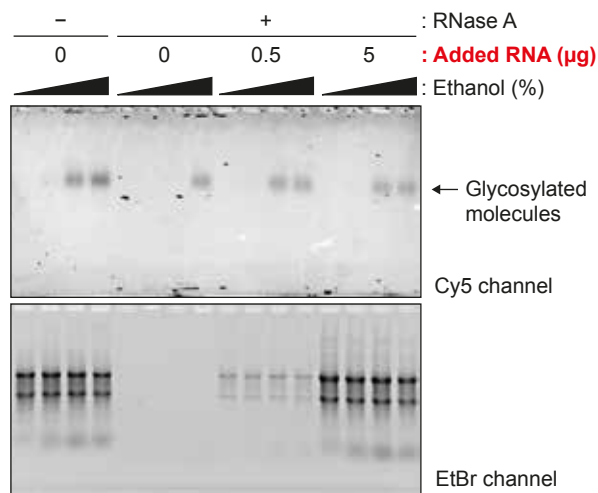**c**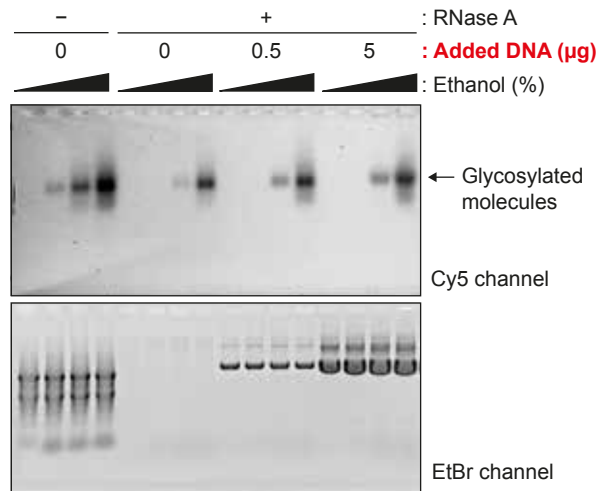

Source: https://www.biorxiv.org/content/10.1101/2024.03.12.584655v1.full.pdf
